# Supplementary material
Source: MDPI journal article supplement (https://www.mdpi.com/2227-9717/11/6/1834)
Supplement: s1 [file s1]

# **Effects of Bio-coal Briquette for Residential Combustion on Brown Carbon Emission Reduction**

Juan Qi<sup>1,2</sup>, Jianjun Wu<sup>2\*</sup>

<sup>1</sup> School of Chemical Engineering and Technology, Department of Basic Courses, Xuzhou College of Industrial Technology, Xuzhou 221140, China; qij@mail.xzcit.cn (J.Q.)

<sup>2</sup> National Engineering Research Center of Coal Preparation and Purification, School of Chemical Engineering and Technology, China University of Mining and Technology, Xuzhou 221116, China.

\*Corresponding author: E-Mail: wujj@cumt.edu.cn

**6 tables**

**Table S1:** The results of orthogonal experiment of bio-coal briquette mixed with rice straw.

| Factor No. | Biomass/anthracite (kg/kg) | Particle size (mm) | Molding pressure (MPa) | Shatter strength (%) | Compressive strength (kN) |
|------------|----------------------------|--------------------|------------------------|----------------------|---------------------------|
| 1          | 1:9                        | 1                  | 15                     | 97.90                | 11.32                     |
| 2          | 1:9                        | 2                  | 25                     | 99.13                | 13.00                     |
| 3          | 1:9                        | 3                  | 35                     | 99.02                | 13.73                     |
| 4          | 1:4                        | 1                  | 25                     | 99.75                | 18.77                     |
| 5          | 1:4                        | 2                  | 35                     | 98.74                | 18.55                     |
| 6          | 1:4                        | 3                  | 15                     | 98.11                | 21.88                     |
| 7          | 3:7                        | 1                  | 35                     | 18.29                | 12.01                     |
| 8          | 3:7                        | 2                  | 15                     | 79.27                | 15.88                     |
| 9          | 3:7                        | 3                  | 25                     | 96.47                | 8.25                      |

**Table S2:** The results of orthogonal experiment of bio-coal briquette mixed with corn straw.

| Factor No. | Biomass/anthracite (kg/kg) | Particle size (mm) | Molding pressure (MPa) | Shatter strength (%) | Compressive strength (kN) |
|------------|----------------------------|--------------------|------------------------|----------------------|---------------------------|
| 1          | 1:9                        | 1                  | 15                     | 99.74                | 12.17                     |
| 2          | 1:9                        | 2                  | 25                     | 95.23                | 14.18                     |
| 3          | 1:9                        | 3                  | 35                     | 99.44                | 16.41                     |
| 4          | 1:4                        | 1                  | 25                     | 99.72                | 24.55                     |
| 5          | 1:4                        | 2                  | 35                     | 98.47                | 19.65                     |
| 6          | 1:4                        | 3                  | 15                     | 87.72                | 11.12                     |
| 7          | 3:7                        | 1                  | 35                     | 96.32                | 13.01                     |
| 8          | 3:7                        | 2                  | 15                     | 66.65                | 13.45                     |
| 9          | 3:7                        | 3                  | 25                     | 84.12                | 12.69                     |

**Table S3:** The shatter strength analysis of rice straw-coal briquette.

| Index            |                       | A      | B      | C      |
|------------------|-----------------------|--------|--------|--------|
| Shatter strength | K1                    | 296.05 | 215.94 | 275.28 |
|                  | K2                    | 296.60 | 277.14 | 295.35 |
|                  | K3                    | 194.03 | 293.60 | 216.05 |
|                  | k1                    | 98.68  | 71.98  | 91.76  |
|                  | k2                    | 98.87  | 92.38  | 98.45  |
|                  | k3                    | 64.68  | 97.87  | 72.02  |
|                  | R                     | 34.19  | 25.89  | 26.43  |
|                  | Factor ranking        | ACB    |        |        |
|                  | Excellent combination | A2C2B3 |        |        |

**Table S4:** The compressive strength analysis of rice straw-coal briquette.

| Index                |                       | A      | B     | C     |
|----------------------|-----------------------|--------|-------|-------|
| Compressive strength | K1                    | 38.05  | 42.10 | 49.07 |
|                      | K2                    | 59.20  | 47.43 | 40.02 |
|                      | K3                    | 36.14  | 43.86 | 44.29 |
|                      | k1                    | 12.68  | 14.03 | 16.36 |
|                      | k2                    | 19.73  | 15.81 | 13.34 |
|                      | k3                    | 12.05  | 14.62 | 14.76 |
|                      | R                     | 7.69   | 1.78  | 3.02  |
|                      | factor ranking        | ACB    |       |       |
|                      | Excellent combination | A2C1B2 |       |       |

**Table S5:** The shatter strength analysis of corn straw-coal briquette.

| Index            |                       | A      | B      | C      |
|------------------|-----------------------|--------|--------|--------|
| Shatter strength | K1                    | 294.41 | 295.78 | 254.11 |
|                  | K2                    | 285.91 | 260.35 | 279.07 |
|                  | K3                    | 247.09 | 271.28 | 294.23 |
|                  | k1                    | 98.14  | 98.59  | 84.70  |
|                  | k2                    | 95.30  | 86.78  | 93.02  |
|                  | k3                    | 82.36  | 90.43  | 98.08  |
|                  | R                     | 15.78  | 11.81  | 13.38  |
|                  | Factor ranking        | ACB    |        |        |
|                  | Excellent combination | A1C3B1 |        |        |

**Table S6:** The compressive strength analysis of corn straw -coal briquette.

| Index                |                       | A       | B     | C     |
|----------------------|-----------------------|---------|-------|-------|
| Compressive strength | K1                    | 42.76   | 49.73 | 36.74 |
|                      | K2                    | 55.32   | 47.28 | 51.42 |
|                      | K3                    | 39.15   | 40.22 | 49.07 |
|                      | k1                    | 14.25   | 16.58 | 12.25 |
|                      | k2                    | 18.44   | 15.76 | 17.14 |
|                      | k3                    | 13.05   | 13.41 | 16.36 |
|                      | R                     | 5.39    | 3.17  | 4.89  |
|                      | Factor ranking        | ACB     |       |       |
|                      | Excellent combination | A2C2 B1 |       |       |
